# Supplementary material for: Helicobacter pylori Eradication Can Reverse the Methylation-Associated Regulation of miR-200a/b in Gastric Carcinogenesis
Source: PubMed Central journal article supplement — Gut Liver. 2020 Jan 3;14(5):571–80. doi: 10.5009/gnl19299 (PMC7492500; doi:10.5009/gnl19299), 2020-01-03
Supplement: GNL-14-571_Supple.pdf [file GNL-14-571_Supple.pdf]

**Supplementary Table 1.** Short Tandem Repeat Profiles of the Gastric Cancer Cell Lines

|        | D3S1358 | vWA   | FGA   | Amelogenin | TH01 | TPOX  | CSF1P0 | D5S818 | D13S317 | D7S820 |
|--------|---------|-------|-------|------------|------|-------|--------|--------|---------|--------|
| AGS    | 15,2    | 16,17 | 23,24 | X          | 6,7  | 11,12 | 11,12  | 9,12   | 12      | 10,11  |
| MKN-1  | 15,17   | 16    | 20,23 | X          | 9    | 8     | 9,12   | 11     | 10,12   | 10     |
| MKN-45 | 15,16   | 19    | 19    | X          | 7    | 8     | 12     | 10,11  | 8,11    | 10,11  |

**Supplementary Table 2.** The Individual Primers and Probes for the MethyLight Assay

| Gene            | Primer/probe   | Sequence (5'→3')             | Product length, bp | Annealing T <sub>m</sub> , °C |
|-----------------|----------------|------------------------------|--------------------|-------------------------------|
| <i>miR-200a</i> | Forward primer | CCCTATCCGATCCCGACACC         | 20                 | 59.5                          |
|                 | Reverse primer | AGGGACGTGGGGTTTCGTTA         | 20                 | 59.1                          |
|                 | Probe          | CCTAACTACTACCGCTCCGATTCTTCCC | 29                 | 67.5                          |
| <i>miR-200b</i> | Forward primer | AGTGTTTTAGGAGGACGAGGTTT      | 23                 | 58.3                          |
|                 | Reverse primer | ATACTACCCAATAAAATAACCACGACTA | 28                 | 58.0                          |
|                 | Probe          | CCGAACTAAATCCGAAAACCGCCCGA   | 26                 | 66.7                          |

T<sub>m</sub>, melting temperature.

**Supplementary Table 3.** Expression and Promoter Methylation Levels of *miR-200a/b* According to the Subtypes of Gastric Cancer

| Type                  | No.       | <i>miR-200a</i>     |         |                      |         | <i>miR-200b</i>     |         |                      |         |
|-----------------------|-----------|---------------------|---------|----------------------|---------|---------------------|---------|----------------------|---------|
|                       |           | Relative expression | p-value | Promoter methylation | p-value | Relative expression | p-value | Promoter methylation | p-value |
| Tumor differentiation |           |                     |         |                      |         |                     |         |                      |         |
| WD                    | 28 (70.0) | 0.07 (0.04–0.10)    | 0.737   | 40.17 (29.20–59.30)  | 0.046   | 0.14 (0.02–0.25)    | 0.300   | 22.43 (42.48–12.65)  | 0.280   |
| MD                    | 9 (22.5)  | 0.10 (0.05–0.15)    |         | 28.40 (18.53–68.07)  |         | 0.12 (0.04–1.85)    |         | 14.99 (4.50–74.86)   |         |
| PD                    | 3 (7.5)   | 0.07 (NA)           |         | 90.03 (NA)           |         | 0.01 (NA)           |         | 63.71 (NA)           |         |
| Gross appearance      |           |                     |         |                      |         |                     |         |                      |         |
| Elevated              | 4 (10.0)  | 0.07 (0.03–0.25)    | 0.450   | 39.43 (31.01–45.61)  | 0.671   | 0.19 (0.03–0.44)    | 0.979   | 14.79 (11.38–41.19)  | 0.469   |
| Flat                  | 7 (17.5)  | 0.12 (0.03–0.49)    |         | 39.12 (24.14–43.98)  |         | 0.13 (0.07–0.24)    |         | 13.96 (5.03–52.27)   |         |
| Depressed             | 29 (72.5) | 0.07 (0.04–0.10)    |         | 43.59 (24.71–65.15)  |         | 0.10 (0.02–0.39)    |         | 28.82 (13.34–46.24)  |         |
| Lauren classification |           |                     |         |                      |         |                     |         |                      |         |
| Intestinal type       | 39 (97.5) | 0.07 (0.04–0.12)    | 0.722   | 40.04 (24.43–58.84)  | 0.528   | 0.13 (0.02–0.28)    | 0.595   | 22.73 (11.10–46.43)  | 0.718   |
| Diffuse type          | 1 (2.5)   | 0.07 (NA)           |         | 62.34 (NA)           |         | 0.01 (NA)           |         | 22.37 (NA)           |         |
| Tumor size, cm        |           |                     |         |                      |         |                     |         |                      |         |
| ≤1                    | 11 (27.5) | 0.05 (0.03–0.12)    | 0.696   | 39.12 (17.53–55.18)  | 0.394   | 0.07 (0.02–0.24)    | 0.721   | 20.29 (3.96–35.93)   | 0.363   |
| 1–2                   | 16 (40.0) | 0.08 (0.05–0.18)    |         | 47.90 (26.81–68.19)  |         | 0.19 (0.01–0.30)    |         | 19.82 (14.09–45.57)  |         |
| >2                    | 13 (32.5) | 0.07 (0.04–0.12)    |         | 40.02 (29.37–55.62)  |         | 0.12 (0.02–0.36)    |         | 31.55 (12.31–56.21)  |         |
| Depth of invasion     |           |                     |         |                      |         |                     |         |                      |         |
| Mucosa                | 37 (92.5) | 0.07 (0.04–0.12)    | 0.709   | 42.14 (28.72–61.42)  | 0.111   | 0.13 (0.02–0.28)    | 0.651   | 22.37 (11.66–48.08)  | 0.514   |
| Submucosa             | 3 (7.5)   | 0.10 (NA)           |         | 19.53 (NA)           |         | 0.09 (NA)           |         | 31.55 (NA)           |         |

Data are presented as the number (%) or median (interquartile range).

WD, well differentiated adenocarcinoma; MD, moderately differentiated adenocarcinoma; PD, poorly differentiated adenocarcinoma; NA, not applicable.

**Supplementary Table 4.** The Promoter Methylation Levels of *miR-200a/b* in the *Helicobacter pylori*-Negative Controls, *H. pylori*-Positive Controls, and *H. pylori*-Positive Gastric Cancer Group

|                 | <i>H. pylori</i> -negative controls (n=20) | <i>H. pylori</i> -positive controls (n=20) | <i>H. pylori</i> -positive gastric cancer patients (n=40) |
|-----------------|--------------------------------------------|--------------------------------------------|-----------------------------------------------------------|
| <i>miR-200a</i> | 11.5 (3.0–27.9)                            | 28.4 (8.2–49.2)                            | 40.3 (6.4–100.0)                                          |
| <i>miR-200b</i> | 9.9 (3.0–23.5)                             | 15.3 (3.3–25.5)                            | 22.6 (2.8–100.0)                                          |

Data are median (ranges) of percentage of methylated reference.

**A**

1,167,755 CCGCCAGCCC TGTCCGGTCC CGGCACCACC  
1,167,785 CCTGGCTGCT CACCGCTCCG GTTCTTCCCT  
1,167,815 GGGCTTCCAC AGCAGCCCT GCCTGCCTGG  
1,167,845 CGGGACCCCA CGTCCCTCCC GGGCCCCTGT  
1,167,875 GAGCATCTTA CCGGACAGTG CTGGATTTC

**B**

1,167,015 TGCCTCAGT GCCCCAGGAG GACCGAGGCC  
1,167,045 CCCAGCTACT DADCTTCCCA GCGAGTCCCA  
1,167,075 TGCAACCCTC AGCCGGGCGG CCCCCGGACC  
1,167,105 CAGCTCGGC AGCCGTGGCC ATCTTACTGG  
1,167,135 GCAGCATTGG ATGGAGTCAG GTCTTAATA

**Supplementary Fig. 1.** The sequences of the promoter CpG island region of (A) *miR-200a* and (B) *miR-200b*. The binding sites of the forward and reverse primers were boxed with solid line, and the binding sites of the probe were boxed with dotted line. In this study, methylation status of six CpG sites in the promoter region was analyzed for both *miR-200a* and *miR-200b*, which were highlighted as bold and underline.
